# Supplementary material for: FIR-LSTM: An Explainable Deep Learning Framework for Predicting Iatrogenic Withdrawal Syndrome in Pediatric Intensive Care Units
Source: Research Square preprint supplement (doi:10.21203/rs.3.rs-6787167/v1), 2025-06-25
Supplement: Supplementary file 1 [file 8c30beae532a4e98b1d3435e.docx]

# Appendix B: Feature Descriptions

| **Feature Name** | **Description** | **Unit** |
| --- | --- | --- |
| **Static Variables** | | |
| Duration of ventilation | Cumulative duration of ventilation. | hours |
| Age | Patient's age. | months |
| **Dynamic Variables** | | |
| Previous withdrawal epochs | Number of time epochs with a WAT-1 score ≥ 3 (indicative of withdrawal) prior to the current 4-hour epoch. | count |
| Previous epochs | Number of 4-hour epochs prior to the current 4-hour epoch. | count |
| **Dynamic Vital Sign Variables** | | |
| Temperature | Patient's body temperature. | degrees Centigrade |
| Temperature (Minimum value) | Minimum temperature value in the 4-hour epoch. | degrees Centigrade |
| Temperature (Maximum value) | Maximum temperature value in the 4-hour epoch. | degrees Centigrade |
| Temperature (Max delta change) | Difference between the maximum and minimum temperature in the 4-hour epoch. | degrees Centigrade |
| Temperature (Average value) | Average temperature value in the 4-hour epoch. | degrees Centigrade |
| Temperature (Measure count) | Number of temperature measurements in the 4-hour epoch. | count |
| Heart rate | Number of beats per minute. | beats/min |
| Heart rate (Minimum value) | Minimum heart rate value in the 4-hour epoch. | beats/min |
| Heart rate (Maximum value) | Maximum heart rate value in the 4-hour epoch. | beats/min |
| Heart rate (Max delta change) | Difference between the maximum and minimum heart rate values in the 4-hour epoch. | beats/min |
| Heart rate (Average value) | Average heart rate value in the 4-hour epoch. | beats/min |
| Heart rate (Measure count) | Number of heart rate measurements in the 4-hour epoch. | count |
| Systolic blood pressure | Systolic blood pressure measurement. | mm Hg |
| Systolic blood pressure (Minimum value) | Minimum systolic blood pressure value in the 4-hour epoch. | mm Hg |
| Systolic blood pressure (Maximum value) | Maximum systolic blood pressure value in the 4-hour epoch. | mm Hg |
| Systolic blood pressure (Max delta change) | Difference between the maximum and minimum systolic blood pressure value in the 4-hour epoch. | mm Hg |
| Systolic blood pressure (Average value) | Average systolic blood pressure value in the 4-hour epoch. | mm Hg |
| Systolic blood pressure (Measure count) | Number of systolic blood pressure measurements in the 4-hour epoch. | count |
| Diastolic blood pressure | Diastolic blood pressure measurement. | mm Hg |
| Diastolic blood pressure (Minimum value) | Minimum diastolic blood pressure value in the 4-hour epoch. | mm Hg |
| Diastolic blood pressure (Maximum value) | Maximum diastolic blood pressure value in the 4-hour epoch. | mm Hg |
| Diastolic blood pressure (Max delta change) | Difference between the maximum and minimum diastolic blood pressure values in the 4-hour epoch. | mm Hg |
| Diastolic blood pressure (Average value) | Average diastolic blood pressure value in the 4-hour epoch. | mm Hg |
| Diastolic blood pressure (Measure count) | Number of diastolic blood pressure measurements in the 4-hour epoch. | count |
| Respiratory rate | Number of breaths per minute. | breaths/min |
| Respiratory rate (Minimum value) | Minimum respiratory rate value in the 4-hour epoch. | breaths/min |
| Respiratory rate (Maximum value) | Maximum respiratory rate value in the 4-hour epoch. | breaths/min |
| Respiratory rate (Max delta change) | Difference between the maximum and minimum respiratory rate values in the 4-hour epoch. | breaths/min |
| Respiratory rate (Average value) | Averagerespiratory rate value n the 4-hour epoch. | breaths/min |
| Respiratory rate (Measure count) | Number of respiratory rate measurements in the 4-hour epoch. | count |
| Mean arterial pressure | Mean arterial pressure measurement. | mm Hg |
| Mean arterial pressure (Minimum value) | Minimum mean arterial pressure value in the 4-hour epoch. | mm Hg |
| Mean arterial pressure (Maximum value) | Maximum mean arterial pressure value in the 4-hour epoch. | mm Hg |
| Mean arterial pressure (Max delta change) | Difference between the maximum and minimum mean arterial pressure value in the 4-hour epoch. | mm Hg |
| Mean arterial pressure (Average value) | Average mean arterial pressure value in the 4-hour epoch. | mm Hg |
| Mean arterial pressure (Measure count) | Number of mean arterial pressure measurements in the 4-hour epoch. | count |
| **Dynamic Medication Variables** | | |
| Hydromorphone | Opioid Medication. | mg/kg |
| Hydromorphone (Current average dose) | Average Hydromorphone dose administered in the 4-hour epoch. | mg/kg |
| Hydromorphone (Previous total dose) | Total Hydromorphone dose administered in the prior 4-hour epoch. | mg/kg |
| Hydromorphone (Cumulative dose to now) | Total Hydromorphone dose administered from admission to the beginning of the current 4-hour epoch. | mg/kg |
| Hydromorphone (Duration) | Cumulative duration of Hydromorphone from admission to the beginning of the current 4-hour epoch. | hours |
| Fentanyl | Opioid Medication. | mg/kg |
| Fentanyl (Current average dose) | Average Fentanyl dose administered in the 4-hour epoch. | mg/kg |
| Fentanyl (Previous total dose) | Total Fentanyl dose administered in the prior 4-hour epoch. | mg/kg |
| Fentanyl (Cumulative dose to now) | Total Fentanyl dose administered from admission to the beginning of the current 4-hour epoch. | mg/kg |
| Fentanyl (Duration) | Cumulative duration of Fentanyl from admission to the beginning of the current 4-hour epoch. | hours |
| Lorazepam | Sedative Medication. | mg/kg |
| Lorazepam (Current average dose) | Average Lorazepam dose administered in the 4-hour epoch. | mg/kg |
| Lorazepam (Previous total dose) | Total Lorazepam dose administered in the prior 4-hour epoch. | mg/kg |
| Lorazepam (Cumulative dose to now) | Total Lorazepam dose administered from admission to the beginning of the current 4-hour epoch. | mg/kg |
| Lorazepam (Duration) | Cumulative duration of Lorazepam from admission to the beginning of the current 4-hour epoch. | hours |
| Methadone | Opioid Medication. | mg/kg |
| Methadone (Current average dose) | Average Methadone dose administered in the 4-hour epoch. | mg/kg |
| Methadone (Previous total dose) | Total Methadone dose administered in the prior 4-hour epoch. | mg/kg |
| Methadone (Cumulative dose to now) | Total Methadone dose administered from admission to the beginning of the current 4-hour epoch. | mg/kg |
| Methadone (Duration) | Cumulative duration of Methadone from admission to the beginning of the current 4-hour epoch. | hours |
| Midazolam | Sedative Medication. | mg/kg |
| Midazolam (Current average dose) | Average Midazolam dose administered in the 4-hour epoch. | mg/kg |
| Midazolam (Previous total dose) | Total Midazolam dose administered in the prior 4-hour epoch. | mg/kg |
| Midazolam (Cumulative dose to now) | Total Midazolam dose administered from admission to the beginning of the current 4-hour epoch. | mg/kg |
| Midazolam (Duration) | Cumulative duration of Midazolam from admission to the beginning of the current 4-hour epoch. | hours |
| Morphine | Opioid Medication. | mg/kg |
| Morphine (Current average dose) | Average Morphine dose administered in the 4-hour epoch. | mg/kg |
| Morphine (Previous total dose) | Total Morphine dose administered in the prior 4-hour epoch. | mg/kg |
| Morphine (Cumulative dose to now) | Total Morphine dose administered from admission to the beginning of the current 4-hour epoch. | mg/kg |
| Morphine (Duration) | Cumulative duration of Morphine from admission to the beginning of the current 4-hour epoch. | hours |
| Propofol | Sedative Medication. | mg/kg |
| Propofol (Current average dose) | Average Propofol dose administered in the 4-hour epoch. | mg/kg |
| Propofol (Previous total dose) | Total Propofol dose administered in the prior 4-hour epoch. | mg/kg |
| Propofol (Cumulative dose to now) | Total Propofol dose administered from admission to the beginning of the current 4-hour epoch. | mg/kg |
| Propofol (Duration) | Cumulative duration of Propofol from admission to the beginning of the current 4-hour epoch. | hours |
| Dexmedetomidine | Sedative Medication. | mg/kg |
| Dexmedetomidine (Current average dose) | Average Dexmedetomidine dose administered in the 4-hour epoch. | mg/kg |
| Dexmedetomidine (Previous total dose) | Total Dexmedetomidine dose administered in the prior 4-hour epoch. | mg/kg |
| Dexmedetomidine (Cumulative dose to now) | Total Dexmedetomidine dose administered from admission to the beginning of the current 4-hour epoch. | mg/kg |
| Dexmedetomidine (Duration) | Cumulative duration of Dexmedetomidine from admission to the beginning of the current 4-hour epoch. | hours |
