# Supplementary material for: FIR-LSTM: An Explainable Deep Learning Framework for Predicting Iatrogenic Withdrawal Syndrome in Pediatric Intensive Care Units
Source: Research Square preprint supplement (doi:10.21203/rs.3.rs-6787167/v1), 2025-06-25
Supplement: Supplementary file 2 [file c3b338025fb31c79d5317e7b.docx]

# **Appendix A: The Withdrawal Assessment Tool-1 (WAT-1)1**

The WAT-1 is a nursing screening tool designed for use after weaning medications begin. The original manuscript recommended assessments every 12 hours; however, frequency of assessments differ across hospital systems. The nursing assessment involves 2 phases, 1) a review of the chart for evidence of loose stools, vomiting/wretching, and elevated temperature, 2) a stimulus and observation period for variables encompassing muscle tone, tremors, sweating, and time to regain a calm state. At the study site, the WAT-1 score evaluations begin after extubation and removal of mechanical ventilation. This generally occurs every 4 hours and is extended as withdrawal symptoms subside.


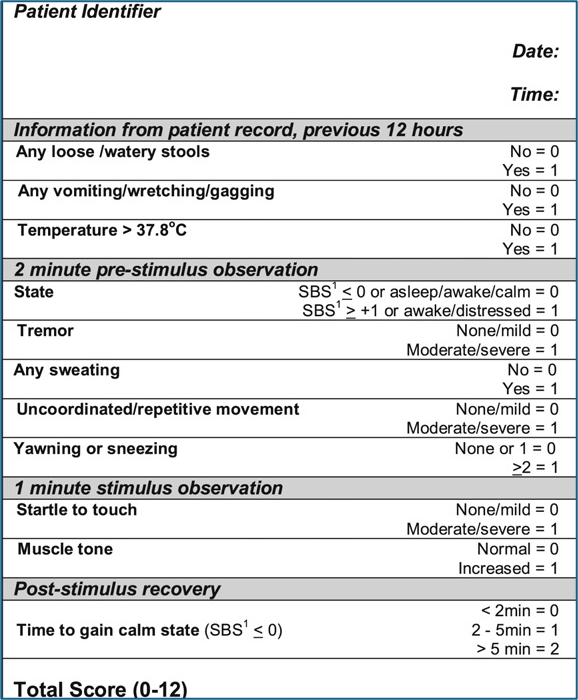


1. Franck, L. S., Harris, S. K., Soetenga, D. J., Amling, J. K. & Curley, M. A. Q. The Withdrawal Assessment Tool–1 (WAT–1): An assessment instrument for monitoring opioid and benzodiazepine withdrawal symptoms in pediatric patients*. *Pediatric Critical Care Medicine* 9, 573–580 (2008).
